# Supplementary material
Source: HighWire-hosted journal article supplement (https://www.annfammed.org/highwire/filestream/8408/field_highwire_adjunct_files/2/508Supp_Table_3.pdf)
Supplement: 508Supp_Table_3.pdf [file 508Supp_Table_3.pdf]

**Online Supplementary Material**

Lebrun-Harris LA, Shi L, Zhu J, Burke MT, Sripipatana A, Ngo-Metzger Q. Effects of patient-centered medical home attributes on patients' perceptions of quality in federally supported health centers. *Ann Fam Med*. 2013;11(6):508-516.

<http://www.annfammed.org/content/11/6/508>

**Supplemental Table 3. Bivariate Correlation Coefficients Among 4 Factors**

| <b>Factor</b>                                 | <b>Patient-Centered<br/>Communication:<br/>Support Staff</b> | <b>Patient-Centered<br/>Communication:<br/>Clinician</b> | <b>Access to<br/>Care: During<br/>the Visit</b> | <b>Access to Care:<br/>Getting There</b> |
|-----------------------------------------------|--------------------------------------------------------------|----------------------------------------------------------|-------------------------------------------------|------------------------------------------|
| Patient-centered communication: support staff | 1.000                                                        | 0.539 <sup>a</sup>                                       | 0.369 <sup>a</sup>                              | 0.443 <sup>a</sup>                       |
| Patient-centered communication: clinician     | 0.539 <sup>a</sup>                                           | 1.000                                                    | 0.383 <sup>a</sup>                              | 0.425 <sup>a</sup>                       |
| Access to care: during the visit              | 0.369 <sup>a</sup>                                           | 0.383 <sup>a</sup>                                       | 1.000                                           | 0.524 <sup>a</sup>                       |
| Access to care: getting there                 | 0.443 <sup>a</sup>                                           | 0.425 <sup>a</sup>                                       | 0.524 <sup>a</sup>                              | 1.000                                    |

<sup>a</sup>  $P < .05$ .
